# Supplementary material for: Iota-carrageenan and xylitol inhibit SARS-CoV-2 in Vero cell culture
Source: PLOS journal article supplement (doi:10.1371/journal.pone.0259943), 2021-11-19
Supplement: S8 (10.1371/journal.pone.0259943.s008) [file journal.pone.0259943.s008]

**Table S8. Statistical analysis of residual virus titers determined after each treatment with different concentrations of iota-carrageenan in Diluent P3 (xylitol 50 mg/mL adjusted to pH 6-7)**

|                            |                                                                                                                                                                    |
|----------------------------|--------------------------------------------------------------------------------------------------------------------------------------------------------------------|
| <b>Kruskal Wallis test</b> | Chi-square = 17, degrees of freedom = 5, p-value = 0.0045<br>This means that there are statistically significant differences between the treatments ( $p < 0.05$ ) |
|----------------------------|--------------------------------------------------------------------------------------------------------------------------------------------------------------------|
